# Supplementary material
Source: PubMed Central journal article supplement (PMC5420427)
Supplement: NIHMS842379-supplement.pdf [file NIHMS842379-supplement.pdf]

## Supplemental Material for

### Specific regions of the brain are capable of fructose metabolism

Sarah A. Oppelt, Wanming Zhang and Dean R. Tolan

*VNB predicts the brain as a site for fructose metabolism.*

Prediction of tissues other than the liver and kidneys that express genes required for fructose metabolism *via* the Fru-1-P pathway was performed using a bioinformatics approach aimed at physiomic assessment of gene expression. The VNB (Funari et al., 2010) was used to compile qualitative and quantitative expression profiles of each gene. By entering the RefSeq sequences of each human cDNA (and its aligned paralogs) for the genes in the Fru-1-P pathway (fructose transporters *gluts 2, 5, 7, 9, and 11*; *khk, aldoB, and aldoC*) into the VNB program, a list of tissues expressing this set of genes was compiled. The total number of EST sequences in dbEST for each gene was tallied for each tissue. This generated a qualitative profile of gene expression per tissue (Table S1), and revealed brain and nervous tissue as potentially major sites capable of fructose metabolism. A more stringent quantitative gene expression profile was generated by VNB, which tallied EST sequences from only those cDNA libraries in dbEST that have not been manipulated. In this quantitative profile, the level of expression of each gene was calculated as a percent of the total mRNA population in each tissue (Table S2). Tissues that had a quantitative level for each gene of >0.001% of total transcripts, with at least two hits in the qualitative profile, were considered for an analysis of tissues that have the key enzymes in

fructose metabolism via Fru 1-P at significant levels. The results are tabulated in Table S3, where the VNB correctly identified the liver and kidney as sites for expression of all the genes necessary for this pathway. Liver was the top ranked tissue in terms of expression levels for each of these genes, or set of genes (as in the case of the *aldos* and *gluts*). Kidney was among the top 19 tissues for these same genes. Notably, spleen/lymphoreticular tissue and brain/nervous tissue were also in the top four tissues predicted to have high expression of *khk*, with expression levels higher than or comparable to kidney for the other genes (*aldos* and *gluts*). By mass, the brain is the largest of these organs, and was the focus of this study. The percentage level of *khk* expression in the brain/nervous tissue was one-third of the liver and nearly that of the kidney. Among the fructose transporters, *glut5* was quantitatively predicted to be in the brain, while *gluts* 2, 7, and 11 were not (Table S2). Overall, there was generally little to no expression of *glut7* in most tissues, whereas *glut9* showed low expression levels in the brain and other tissues (Table S1). Both Table S1 and Table S2 show the full gene-specific qualitative and quantitative patterns, respectively, obtained from VNB.

**Table S1. Qualitative Data from VNB**

| Top Seven Tissues for KHK Expression: |     |       |       |     |       |       |       |       |        |        |
|---------------------------------------|-----|-------|-------|-----|-------|-------|-------|-------|--------|--------|
|                                       | KHK | AldoC | AldoB | DAK | Glut2 | Glut5 | Glut6 | Glut7 | Glut9A | Glut9B |
| liver                                 | 37  | 80    | 392   | 31  | 46    | 1     | 3     |       |        |        |
| kidney                                | 20  | 47    | 48    | 22  | 11    | 36    | 18    | 1     | 24     | 25     |
| Spleen/lymphoreticular/lymphnode      | 12  | 136   | 42    | 77  | 3     | 50    | 25    | 2     | 1      |        |
| lymph node                            | 2   | 16    | 11    | 1   | 1     | 24    | 3     |       | 1      |        |
| spleen                                | 3   | 3     | 16    | 6   | 2     | 1     | 12    |       |        |        |
| lymphoreticular                       | 3   | 53    | 25    | 34  |       | 12    | 1     | 1     |        |        |
| bone marrow                           | 4   | 64    |       | 36  |       | 13    | 9     | 1     |        |        |
| Brain/cerebellum/cerebrum/nervous     | 55  | 2138  | 118   | 84  |       | 75    | 75    | 3     | 1      | 2      |
| brain                                 | 23  | 649   | 61    | 60  |       | 47    | 37    | 1     | 1      | 2      |
| cerebellum                            | 4   | 401   | 2     | 6   |       | 3     | 9     |       |        |        |
| cerebrum                              | 10  | 172   | 18    | 12  |       | 20    | 18    |       |        |        |
| nervous                               | 18  | 107   | 33    | 5   |       | 5     | 10    | 2     |        |        |
| peripheral nervous system             |     | 16    | 4     | 1   |       |       | 1     |       |        |        |
| testis                                | 2   | 34    | 18    | 51  | 2     | 75    | 7     | 6     |        |        |
| placenta                              | 2   | 127   | 73    | 18  | 1     | 6     | 11    | 1     | 4      | 5      |
| uterus                                | 2   | 61    | 30    | 10  | 4     | 1     |       |       | 3      | 3      |
| <b>Other Tissues:</b>                 |     |       |       |     |       |       |       |       |        |        |
| adipose tissue                        |     | 14    |       |     |       |       |       |       |        |        |
| adrenal cortex                        |     | 9     | 4     |     |       |       |       |       |        |        |
| bone                                  | 1   | 8     | 9     | 1   | 2     | 1     | 2     |       | 2      | 2      |
| cartilage                             |     | 5     | 5     | 7   | 1     |       | 3     |       | 1      | 1      |
| cervix                                | 2   | 56    | 28    | 9   | 1     |       | 2     |       |        |        |
| colon                                 | 2   | 71    | 68    | 21  | 1     | 7     |       | 1     |        |        |
| ear                                   |     |       |       |     | 1     |       |       |       |        |        |
| embryonic tissue                      | 1   | 101   | 49    | 12  | 4     | 8     | 2     |       |        |        |
| endocrine                             |     | 1     |       | 5   |       | 1     |       |       |        |        |
| esophagus                             |     | 4     |       | 2   |       |       | 1     |       |        |        |
| eye                                   | 2   | 117   | 55    | 10  |       | 4     | 11    |       | 1      |        |
| gastrointestinal tract                | 4   | 15    | 35    | 36  |       | 8     | 2     |       |        |        |
| genitourinary                         |     | 15    | 11    | 1   |       | 1     |       |       |        |        |
| head and neck                         | 1   | 576   | 605   | 3   |       | 1     |       |       | 1      | 2      |
| heart                                 | 1   | 26    | 18    |     | 1     | 13    | 2     |       |        |        |
| lung                                  | 2   | 150   | 79    | 14  | 2     | 10    | 28    |       | 3      | 3      |
| mammary gland                         | 3   | 90    | 53    | 9   |       | 3     | 4     |       | 1      | 1      |
| muscle                                | 1   | 33    | 14    | 3   | 4     | 9     | 2     |       | 1      | 3      |
| ovary                                 |     | 40    | 30    | 2   |       | 4     | 2     |       | 5      | 7      |
| pancreas                              | 1   | 62    | 33    | 8   |       | 1     | 5     |       |        |        |
| pancreatic islet                      | 3   | 13    | 39    | 1   | 1     |       | 6     |       | 1      |        |
| parathyroid                           |     |       | 1     |     |       |       |       |       |        |        |
| pineal gland                          |     | 1     | 1     |     |       | 1     |       |       |        |        |
| pituitary gland                       |     | 3     |       |     |       |       |       |       |        |        |
| prostate                              | 3   | 70    | 36    | 35  |       | 21    | 7     |       | 1      | 3      |
| retina                                | 2   | 71    | 10    |     |       | 13    | 1     |       | 1      | 1      |
| salivary gland                        |     | 34    | 33    | 1   |       |       |       |       |        |        |
| skin                                  |     | 197   | 105   | 18  | 5     | 1     | 3     |       |        |        |
| stomach                               | 7   | 19    | 8     | 5   | 4     | 2     | 1     |       |        |        |
| synovium                              |     |       |       | 5   |       | 9     | 5     |       |        |        |
| thymus                                |     | 3     |       | 5   |       | 3     | 3     |       | 1      |        |
| thyroid                               | 1   | 29    | 25    | 3   | 1     | 1     | 2     |       |        |        |
| vascular                              |     | 12    | 1     | 1   |       |       | 3     |       | 1      |        |

**Table S1. Quantitative Data from VNB (part 1)**

| Top Seven Tissues for KHK Expression: |      | KHK                |        | AldoC |                    | AldoB  |      | ALDOS              |        | DAK  |                    |        |
|---------------------------------------|------|--------------------|--------|-------|--------------------|--------|------|--------------------|--------|------|--------------------|--------|
|                                       | rank | ratio (hits/picks) | %      | rank  | ratio (hits/picks) | %      | rank | ratio (hits/picks) | %      | rank | ratio (hits/picks) |        |
| liver                                 | 1    | 10/64904           | 0.0154 | 7     | 63/64904           | 0.0970 | 2    | 117/64904          | 0.1802 | 2    | 19/64904           | 0.0292 |
| kidney                                | 2    | 6/73096            | 0.0082 | 24    | 19/73096           | 0.0259 | 16   | 17/73096           | 0.0232 | 19   | 2/73096            | 0.0027 |
| Spleen/lymphoreticular/lymphnode      | 3    |                    | 0.0058 | 18    |                    | 0.0347 | 9    | 4/39066            | 0.0419 | 16   | 1                  | 0.0303 |
| spleen                                |      | 2/20451            | 0.0098 |       | 4/39066            | 0.102  |      | 16/20451           | 0.0782 |      | 2/20451            | 0.0097 |
| lymphoreticular                       |      | 3/66695            | 0.0045 |       | 3/20451            | 0.146  |      | 25/66695           | 0.0374 |      | 3/66695            | 0.0509 |
| bone marrow                           |      | 1/32258            | 0.0031 |       | 53/66695           | 0.0794 |      |                    |        |      |                    |        |
| Brain/cerebellum/cerebrum/nervous     | 4    |                    | 0.0048 | 1     |                    | 0.1870 | 11   |                    | 0.0374 | 6    |                    | 0.0067 |
| brain                                 |      | 2/126222           | 0.0016 |       | 143/126222         | 0.1132 |      | 48/126222          | 0.0380 |      | 11/126222          | 0.0087 |
| cerebellum                            |      |                    |        |       | 27/5235            | 0.5157 |      |                    |        |      |                    |        |
| cerebrum                              |      |                    |        |       | 5/6049             | 0.0826 |      |                    |        |      |                    |        |
| nervous                               |      | 3/37709            | 0.0080 |       | 56/37709           | 0.1485 |      | 21/37709           | 0.0556 |      |                    |        |
| peripheral nervous system             |      |                    |        |       | 16/21313           | 0.0750 |      | 4/21313            | 0.0187 |      | 1/21313            | 0.0046 |
| testis                                | 5    | 1/83915            | 0.0012 | 21    | 25/83915           | 0.0297 | 19   | 16/83915           | 0.0190 | 20   | 0.0487             | 0.0035 |
| placenta                              | 6    | 1/98545            | 0.0010 | 15    | 55/98545           | 0.0558 | 14   | 31/98545           | 0.0314 | 15   | 0.0872             | 0.0071 |
| uterus                                | 7    | 1/136246           | 0.0007 | 16    | 56/136246          | 0.0411 | 18   | 27/136246          | 0.0198 | 18   | 0.0609             | 0.0058 |
| <b>Other Tissues:</b>                 |      |                    |        |       |                    |        |      |                    |        |      |                    |        |
| adipose tissue                        |      |                    |        |       |                    |        |      |                    |        |      |                    |        |
| adrenal cortex                        |      |                    |        | 10    | 9/10935            | 0.0823 | 12   | 4/10935            | 0.0365 | 11   |                    |        |
| bone                                  | 9    | 1/52917            | 0.0019 | 26    | 8/52917            | 0.0151 | 20   | 9/52917            | 0.0170 | 25   | 0.1188             |        |
| cartilage                             |      |                    |        | 29    | 1/24072            | 0.0041 | 24   | 3/24072            | 0.0124 | 28   | 0.0165             |        |
| cervix                                |      |                    |        | 3     | 49/30200           | 0.1622 | 5    | 22/30200           | 0.0728 | 5    | 5/30200            | 0.0165 |
| colon                                 |      |                    |        | 22    | 2/173165           | 0.0287 | 21   | 12/173165          | 0.0164 | 22   | 0.0451             | 0.0095 |
| ear                                   |      |                    |        |       |                    |        |      |                    |        |      |                    |        |
| embryonic tissue                      | 8    | 1/49165            | 0.0020 | 9     | 42/49165           | 0.0854 | 7    | 26/49165           | 0.0528 | 9    | 0.1382             | 0.0061 |
| endocrine                             |      |                    |        |       |                    |        |      |                    |        |      |                    |        |
| esophagus                             |      |                    |        |       |                    |        |      |                    |        |      |                    |        |
| eye                                   |      |                    |        | 8     | 7/175064           | 0.0945 | 8    | 36/75064           | 0.0479 | 8    | 0.1424             | 0.0093 |
| gastrointestinal tract                |      |                    |        | 14    | 9/15486            | 0.0581 | 1    | 29/15486           | 0.1872 | 4    | 0.2453             | 0.0064 |
| genitourinary                         |      |                    |        | 25    | 6/27087            | 0.0221 | 22   | 4/27087            | 0.0147 | 23   | 0.0368             |        |
| head and neck                         |      |                    |        |       |                    |        |      |                    |        |      |                    |        |
| heart                                 |      |                    |        | 23    | 7/26005            | 0.0269 | 26   |                    |        | 26   | 0.0269             |        |
| lung                                  |      |                    |        | 11    | 104/142743         | 0.0728 | 13   | 52/142743          | 0.0364 | 13   | 0.1092             | 0.0063 |
| mammary gland                         |      |                    |        | 4     | 65/41448           | 0.1568 | 4    | 37/41448           | 0.0892 | 3    | 0.2460             |        |
| muscle                                |      |                    |        | 19    | 24/70896           | 0.0338 | 23   | 10/70896           | 0.0141 | 21   | 0.0479             | 0.0028 |
| ovary                                 |      |                    |        | 17    | 34/88281           | 0.0385 | 17   | 20/88281           | 0.0226 | 17   | 0.0611             | 0.0011 |
| pancreas                              | 10   | 1/87367            | 0.0011 | 13    | 62/87367           | 0.0709 | 10   | 33/87367           | 0.0377 | 14   | 0.1086             | 0.0091 |
| pancreatic islet                      |      |                    |        |       |                    |        |      |                    |        |      |                    |        |
| parathyroid                           |      |                    |        |       |                    |        |      |                    |        |      |                    |        |
| pineal gland                          |      |                    |        | 27    | 1/8778             | 0.0113 | 25   | 1/8778             | 0.0113 | 27   | 0.0226             |        |
| pituitary gland                       |      |                    |        | 20    | 3/9234             | 0.0324 | 24   |                    |        | 24   | 0.0324             |        |
| prostate                              |      |                    |        | 12    | 60/83999           | 0.0714 | 9    | 32/83999           | 0.0380 | 12   | 0.1094             | 0.0261 |
| retina                                |      |                    |        | 5     | 33/27400           | 0.1204 | 26   | 1/27400            | 0.0036 | 10   | 0.1240             |        |
| salivary gland                        |      |                    |        | 2     | 34/20874           | 0.1628 | 3    | 33/20874           | 0.1580 | 1    | 0.3208             | 0.0047 |
| skin                                  |      |                    |        | 6     | 196/171024         | 0.1146 | 6    | 105/171024         | 0.0613 | 7    | 0.1759             | 0.0105 |
| stomach                               |      |                    |        | 28    | 1/22787            | 0.0043 |      |                    |        | 29   | 0.0043             |        |
| synovium                              |      |                    |        |       |                    |        |      |                    |        |      |                    |        |
| thymus                                |      |                    |        |       |                    |        |      |                    |        |      |                    |        |
| thyroid                               |      |                    |        |       |                    |        |      |                    |        |      |                    |        |
| vascular                              |      |                    |        | 29    | 1/23827            | 0.0041 |      |                    |        | 30   | 0.0041             |        |

**Table S1. Quantitative Data from VNB (part 2)**

|                                                           | Glut2 |          |        | Glut5 |          |        | Glut6 |          |        | Glut7 |       |   | Glut9A |       |   | Glut9B |       |   | FRU GLUTS |       |   |
|-----------------------------------------------------------|-------|----------|--------|-------|----------|--------|-------|----------|--------|-------|-------|---|--------|-------|---|--------|-------|---|-----------|-------|---|
|                                                           | rank  | ratio    | %      | rank  | ratio    | %      | rank  | ratio    | %      | rank  | ratio | % | rank   | ratio | % | rank   | ratio | % | rank      | ratio | % |
| <b>Top Seven Tissues for KHK Expression:</b> (hits/picks) |       |          |        |       |          |        |       |          |        |       |       |   |        |       |   |        |       |   |           |       |   |
| liver                                                     | 2     | 13/64904 | 0.0200 | 15    | 1/64904  | 0.0015 | 14    | 1/64904  | 0.0015 |       |       |   |        |       |   |        |       |   |           |       |   |
| kidney                                                    |       |          |        | 8     | 2/73096  | 0.0027 | 6     | 4/73096  | 0.0054 |       |       |   |        |       |   |        |       |   |           |       |   |
| Spleen/lymphoreticular/lymphnode                          | 3     | 0.0097   | 0.0097 | 4     | 0.0128   | 0.0128 | 8     |          | 0.0045 |       |       |   |        |       |   |        |       |   |           |       |   |
| lymph node                                                |       |          |        |       | 3/39066  | 0.0076 |       | 1/39066  |        |       |       |   |        |       |   |        |       |   |           |       |   |
| spleen                                                    |       | 2/20451  | 0.0097 |       |          |        |       | 2/20451  | 0.0025 |       |       |   |        |       |   |        |       |   |           |       |   |
| lymphoreticular                                           |       |          |        |       | 12/66695 | 0.0179 |       | 1/66695  | 0.0014 |       |       |   |        |       |   |        |       |   |           |       |   |
| bone marrow                                               |       |          |        |       |          |        |       |          | 0.0097 |       |       |   |        |       |   |        |       |   |           |       |   |
| Brain/cerebellum/cerebrum/nervous                         |       |          |        | 12    | 0.0019   | 0.0019 | 5     |          | 0.0055 |       |       |   |        |       |   |        |       |   |           |       |   |
| brain                                                     |       |          |        |       | 2/116754 | 0.0017 |       | 8/126222 | 0.0063 |       |       |   |        |       |   |        |       |   |           |       |   |
| cerebellum                                                |       |          |        |       |          |        |       |          |        |       |       |   |        |       |   |        |       |   |           |       |   |
| cerebrum                                                  |       |          |        |       |          |        |       |          |        |       |       |   |        |       |   |        |       |   |           |       |   |
| nervous                                                   |       |          |        |       | 1/47089  | 0.0021 |       |          |        |       |       |   |        |       |   |        |       |   |           |       |   |
| peripheral nervous system                                 |       |          |        |       |          |        |       |          |        |       |       |   |        |       |   |        |       |   |           |       |   |
| testis                                                    |       |          |        | 9     | 2/83915  | 0.0023 |       | 1/21313  | 0.0046 |       |       |   |        |       |   |        |       |   |           |       |   |
| placenta                                                  |       |          |        | 11    | 2/98545  | 0.0020 | 4     | 7/98545  | 0.0071 |       |       |   |        |       |   |        |       |   |           |       |   |
| uterus                                                    | 6     | 4/136246 | 0.0029 |       |          |        |       |          |        |       |       |   |        |       |   |        |       |   |           |       |   |
|                                                           |       |          |        |       |          |        |       |          |        |       |       |   |        |       |   |        |       |   |           |       |   |
| <b>Other Tissues:</b>                                     |       |          |        |       |          |        |       |          |        |       |       |   |        |       |   |        |       |   |           |       |   |
| adipose tissue                                            |       |          |        |       |          |        |       |          |        |       |       |   |        |       |   |        |       |   |           |       |   |
| adrenal cortex                                            |       |          |        |       |          |        |       |          |        |       |       |   |        |       |   |        |       |   |           |       |   |
| bone                                                      |       |          |        | 13    | 1/52917  | 0.0018 | 13    | 1/52917  | 0.0018 |       |       |   |        |       |   |        |       |   |           |       |   |
| cartilage                                                 |       |          |        |       |          |        | 9     | 1/24072  | 0.0041 |       |       |   |        |       |   |        |       |   |           |       |   |
| cervix                                                    |       |          |        |       |          |        |       |          |        |       |       |   |        |       |   |        |       |   |           |       |   |
| colon                                                     | 9     | 1/73165  | 0.0013 | 17    | 1/73165  | 0.0013 |       |          |        |       |       |   |        |       |   |        |       |   |           |       |   |
| ear                                                       | 4     | 1/14805  | 0.0067 |       |          |        |       |          |        |       |       |   |        |       |   |        |       |   |           |       |   |
| embryonic tissue                                          | 5     | 2/57982  | 0.0034 | 14    | 1/57984  | 0.0017 |       |          |        |       |       |   |        |       |   |        |       |   |           |       |   |
| endocrine                                                 |       |          |        |       |          |        | 1     | 1/2408   | 0.0400 |       |       |   |        |       |   |        |       |   |           |       |   |
| esophagus                                                 |       |          |        |       |          |        |       |          |        |       |       |   |        |       |   |        |       |   |           |       |   |
| eye                                                       |       |          |        |       |          |        | 16    | 1/75064  | 0.0013 |       |       |   |        |       |   |        |       |   |           |       |   |
| gastrointestinal tract                                    |       |          |        | 3     | 2/15486  | 0.0129 |       |          |        |       |       |   |        |       |   |        |       |   |           |       |   |
| genitourinary                                             |       |          |        | 7     | 1/27076  | 0.0036 |       |          |        |       |       |   |        |       |   |        |       |   |           |       |   |
| head and neck                                             |       |          |        |       |          |        |       |          |        |       |       |   |        |       |   |        |       |   |           |       |   |
| heart                                                     |       |          |        | 2     | 5/26005  | 0.0192 |       |          |        |       |       |   |        |       |   |        |       |   |           |       |   |
| lung                                                      | 8     | 2/142743 | 0.0014 | 16    | 2/142743 | 0.0014 |       |          |        |       |       |   |        |       |   |        |       |   |           |       |   |
| mammary gland                                             |       |          |        |       |          |        | 7     | 7/142743 | 0.0049 |       |       |   |        |       |   |        |       |   |           |       |   |
| muscle                                                    |       |          |        |       |          |        | 3     | 3/41448  | 0.0072 |       |       |   |        |       |   |        |       |   |           |       |   |
| ovary                                                     | 1     | 3/106323 | 0.0028 | 6     | 8/70896  | 0.0112 | 15    | 1/70896  | 0.0014 |       |       |   |        |       |   |        |       |   |           |       |   |
| pancreas                                                  |       |          |        | 10    | 2/88281  | 0.0022 | 12    | 2/88281  | 0.0022 |       |       |   |        |       |   |        |       |   |           |       |   |
| pancreatic islet                                          |       |          |        | 18    | 1/87367  | 0.0011 | 10    | 3/87367  | 0.0034 |       |       |   |        |       |   |        |       |   |           |       |   |
| parathyroid                                               |       |          |        |       |          |        | 2     | 1/5868   | 0.0170 |       |       |   |        |       |   |        |       |   |           |       |   |
| pineal gland                                              |       |          |        | 5     | 1/8778   | 0.0113 |       |          |        |       |       |   |        |       |   |        |       |   |           |       |   |
| pituitary gland                                           |       |          |        |       |          |        |       |          |        |       |       |   |        |       |   |        |       |   |           |       |   |
| prostate                                                  |       |          |        | 18    | 1/83999  | 0.0011 | 11    | 2/83999  | 0.0023 |       |       |   |        |       |   |        |       |   |           |       |   |
| retina                                                    |       |          |        | 1     | 9/27400  | 0.0328 |       |          |        |       |       |   |        |       |   |        |       |   |           |       |   |
| salivary gland                                            |       |          |        |       |          |        |       |          |        |       |       |   |        |       |   |        |       |   |           |       |   |
| skin                                                      | 7     | 4/171035 | 0.0023 |       |          |        | 17    | 1/171024 | 0.0005 |       |       |   |        |       |   |        |       |   |           |       |   |
| stomach                                                   |       |          |        |       |          |        |       |          |        |       |       |   |        |       |   |        |       |   |           |       |   |
| synovium                                                  |       |          |        |       |          |        |       |          |        |       |       |   |        |       |   |        |       |   |           |       |   |
| thymus                                                    |       |          |        |       |          |        |       |          |        |       |       |   |        |       |   |        |       |   |           |       |   |
| thyroid                                                   |       |          |        |       |          |        |       |          |        |       |       |   |        |       |   |        |       |   |           |       |   |
| vascular                                                  |       |          |        |       |          |        | 1     | 1/23827  | 0.0042 |       |       |   |        |       |   |        |       |   |           |       |   |

**Table S3**  
**Quantitative Expression Levels for Key Enzymes of the Fru-1-P Pathway**  
**in Tissues<sup>a</sup>**

| Tissue <sup>d</sup>               | <i>khk</i> |       | <i>aldos</i> <sup>b</sup> |       | <i>gluts</i> <sup>c</sup> |       |
|-----------------------------------|------------|-------|---------------------------|-------|---------------------------|-------|
|                                   | rank       | %     | rank                      | %     | rank                      | %     |
| Liver                             | 1          | 0.015 | 1                         | 0.277 | 1                         | 0.022 |
| Kidney                            | 2          | 0.008 | 19                        | 0.049 | 10                        | 0.004 |
| Spleen/lymphoreticular/lymph node | 3          | 0.006 | 16                        | 0.077 | 6                         | 0.012 |
| Brain/cerebellum/cerebrum/nervous | 4          | 0.005 | 6                         | 0.210 | 19                        | 0.001 |
| Testis                            | 5          | 0.001 | 20                        | 0.049 | 13                        | 0.004 |
| Placenta                          | 6          | 0.001 | 15                        | 0.087 | 12                        | 0.004 |
| Uterus                            | 7          | 0.001 | 18                        | 0.061 | 9                         | 0.005 |

<sup>a</sup>Quantitative expression levels are expressed as a percentage of the total mRNA in different tissues generated from the VNB (Funari et al., 2010). Tissues are sorted in descending order by their predicted expression level of *khk*. The list includes only those tissues where the quantitative level was >0.001% with >2 hits in the qualitative/total profile for all genes (see *Supplemental Material*).

<sup>b</sup>The predicted expression values of *aldoB* and *aldoC* were summed (*aldos*) to give a total predicted expression of Fru-1-P-cleaving aldolases.

<sup>c</sup>The predicted expression values of *glut2*, *glut5*, *glut7*, and *glut9* were summed (*gluts*) to give a total predicted expression value of fructose-transporting *gluts*.

<sup>d</sup>The tissues that would have considerable overlap of cell types were grouped. Brain, cerebellum, cerebrum, peripheral nervous tissue, and nervous tissue were averaged. Likewise, spleen, lymph node, bone marrow, and the general lymphoreticular tissues were averaged.

**Figure S1.**

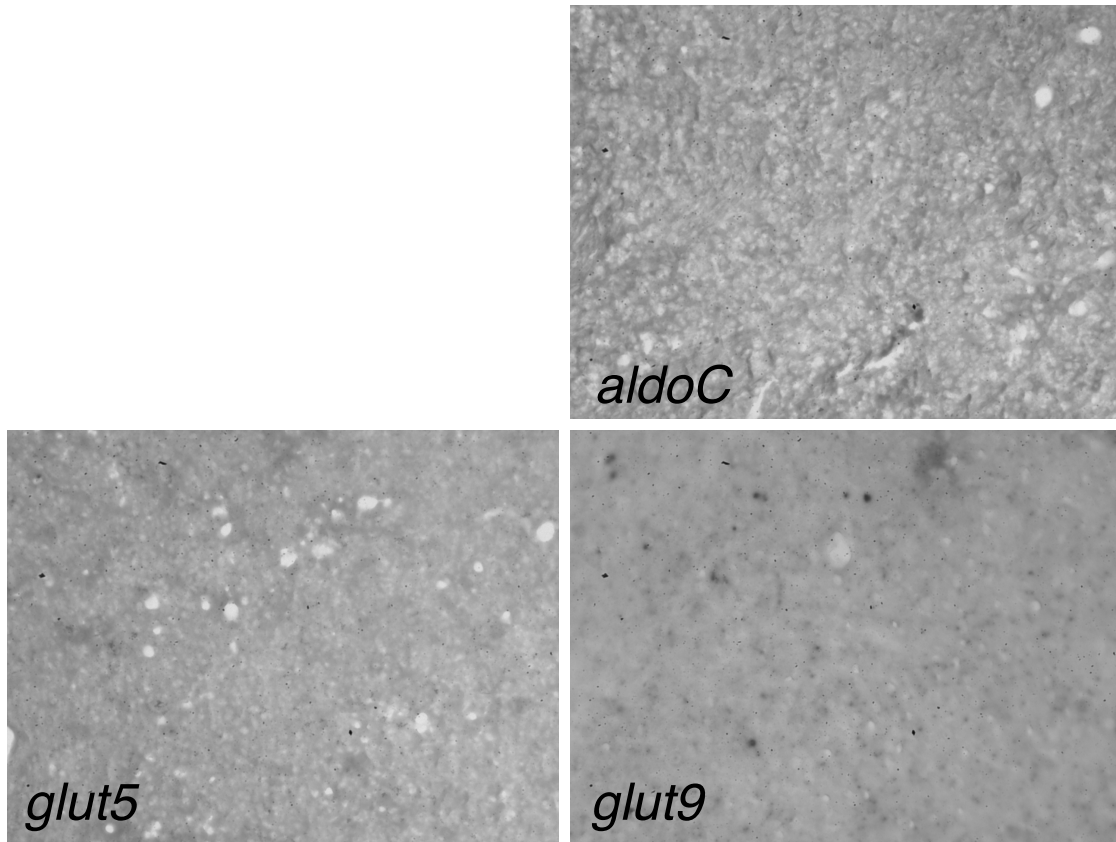

**Fig S1. Negative control for gene expression of genes in the Fru-1-P pathway** Coronal slices (14  $\mu$ m) of adult mouse brain were probed with DIG-conjugated sense mRNA with the same sequence as the mRNA to the genes for aldolase C (*aldoC*), GLUT5 (*glut5*), and GLUT9 (*glut9*). Expression was visualized by color development from horseradish peroxidase-conjugated anti-DIG antibody as described in Experimental Procedures.

**Table S4**

**Substrate Specificity Constant Values ( $k_{cat}/K_m$ ) of Vertebrate Aldolase**

**Isozymes toward both Fru 1,6-P<sub>2</sub> and Fru-1-P<sup>a</sup>**

| Specie              | Fru 1,6-P <sub>2</sub> $k_{cat}/K_m$<br>( $\times 10^{-6} \text{ s}^{-1} \text{ M}^{-1}$ ) |      |      | Fru 1-P $k_{cat}/K_m$<br>( $\times 10^{-6} \text{ s}^{-1} \text{ M}^{-1}$ ) |        |          | RATIO<br>$\frac{\text{Fru 1,6-P}_2 k_{cat}/K_m}{\text{Fru 1-P } k_{cat}/K_m}$ |      |       | Fold difference in RATIOS |     |     |
|---------------------|--------------------------------------------------------------------------------------------|------|------|-----------------------------------------------------------------------------|--------|----------|-------------------------------------------------------------------------------|------|-------|---------------------------|-----|-----|
|                     | AldA                                                                                       | AldB | AldC | AldA                                                                        | AldB   | AldC     | AldA                                                                          | AldB | AldC  | A/B                       | C/B | A/C |
| Rabbit <sup>b</sup> | 3                                                                                          | 0.67 | 1.2  | 0.000048                                                                    | 0.0025 | 0.000068 | 63000                                                                         | 270  | 18000 | 23                        | 7   | 4   |
| Human <sup>c</sup>  | 1.1                                                                                        | 1.8  | 0.49 | 0.000016                                                                    | 0.0019 | 0.00018  | 69000                                                                         | 950  | 2700  | 73                        | 3   | 26  |
| Human <sup>d</sup>  | 1.1                                                                                        | 1.1  | 1.6  | 0.000037                                                                    | 0.0029 | 0.00082  | 30000                                                                         | 380  | 2000  | 80                        | 5   | 15  |

<sup>a</sup>These values were derived from the literature for studies in which all three isozymes were assayed from the same source and the kinetic parameters toward both substrates were reported. <sup>b</sup>From Penhoet and Rutter, 1971. <sup>c</sup>From Pezza *et al.*, 2003. <sup>d</sup>From Kusakabe *et al.*, 1994.

**References**

- Funari, V.A., Voevodski, K., Leyfer, D., Yerkes, K., Cramer, D., Tolan, D.R., 2010. Quantitative gene-expression profiles in real time from expressed sequence tag database. *Gene Expression*. 14, 321-336.
- Kusakabe, T., Motoki, K., Hori, K., 1994. Human aldolase C: characterization of the recombinant enzyme expressed in *Escherichia coli*. *Journal of Biochemistry (Tokyo)*. 115, 1172-1177.
- Penhoet, E.E., Rutter, W.J., 1971. Catalytic and immunochemical properties of homomeric and heteromeric combinations of aldolase subunits. *Journal of Biological Chemistry*. 246, 318-323.
- Pezza, J.A., Choi, K.H., Berardini, T.Z., Beernink, P.T., Allen, K.N., Tolan, D.R., 2003. Spatial clustering of isozyme-specific residues reveals unlikely determinants of isozyme specificity in fructose 1,6-bisphosphate aldolase. *Journal of Biological Chemistry*. 278, 17307-17313.
